# Supplementary material
Source: publisher figshare collection journal article supplement (https://gsajournals.figshare.com/articles/dataset/_/9249245)
Supplement: Supplementary file 1 [file 1]

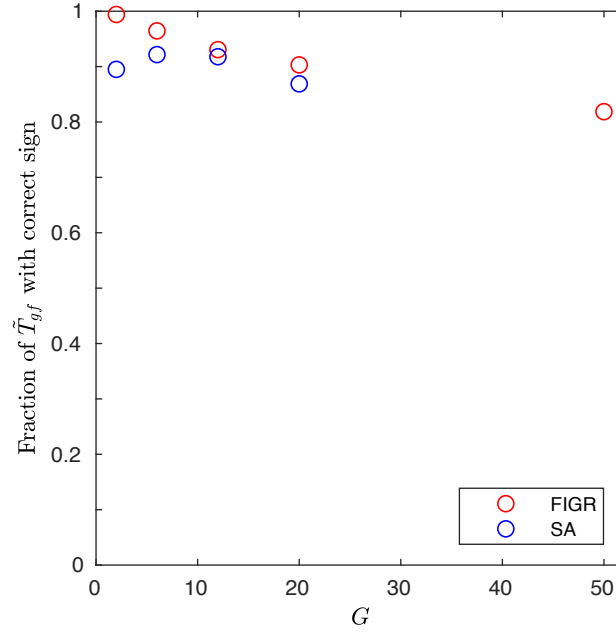

**Figure S1: Fraction of genetic interconnectivity signs inferred correctly from synthetic data.** The fraction of genetic interconnectivity coefficients for which the sign was inferred correctly ( $\text{sgn}(\tilde{T}_{gf}) = \text{sgn}(T_{gf})$ ) is shown.  $\tilde{T}_{gf}$  and  $T_{gf}$  are inferred and theoretical genetic interconnectivity coefficients.  $N = 100$  and  $N_t = 21$ . SA was not run for  $G = 50$  since it was impractical.
