# Supplementary material
Source: publisher figshare collection journal article supplement (https://gsajournals.figshare.com/articles/dataset/_/9249245)
Supplement: Supplementary file 2 [file 1]

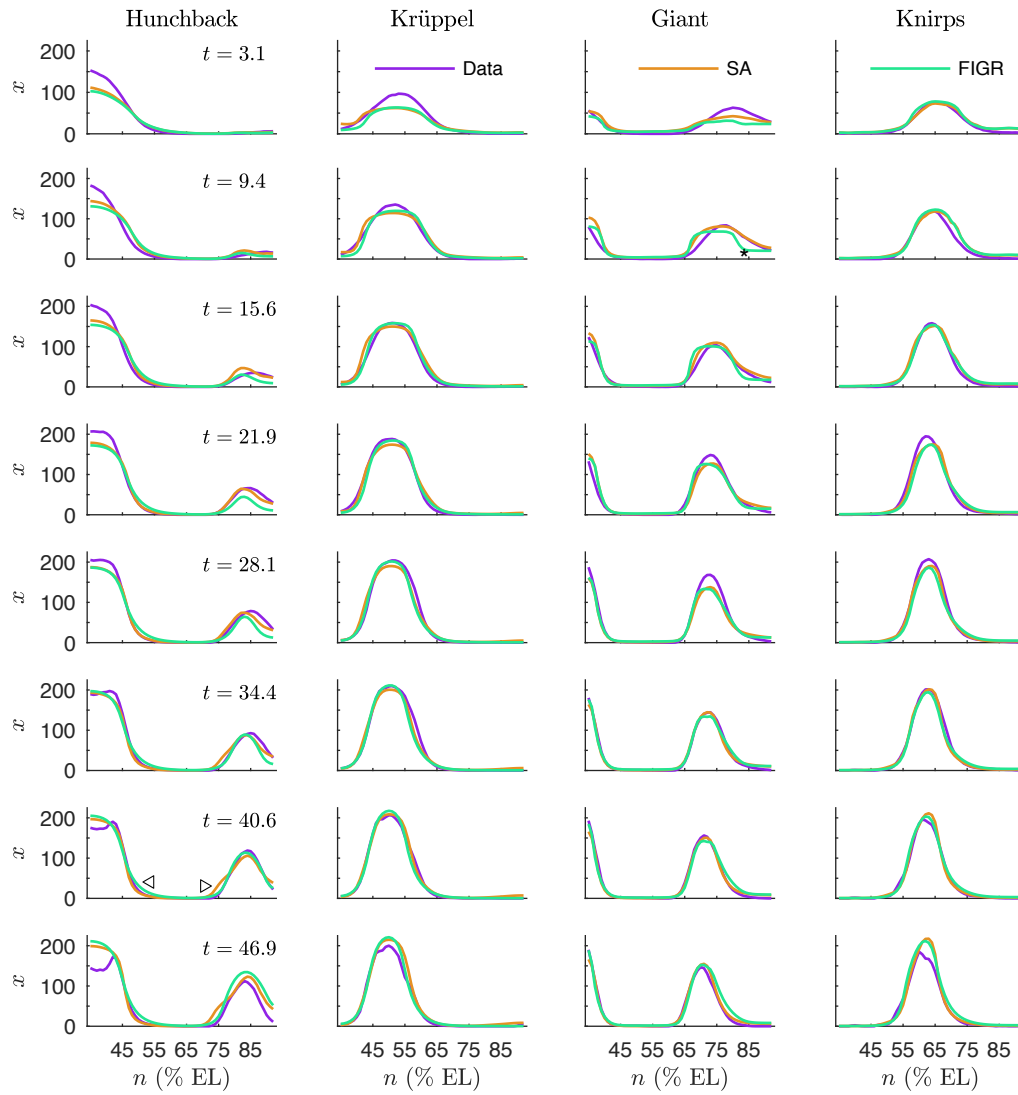

**Figure S4: Comparison of the spatiotemporal pattern of gap gene expression with the output of gene circuits inferred with FIGR and SA.** Continued on following page.

**Figure S4: Comparison of the spatiotemporal pattern of gap gene expression with the output of gene circuits inferred with FIGR and SA.** Horizontal axes indicate anteroposterior position in % egg length (% EL). Vertical axes indicate relative gap protein concentrations. Each row of panels corresponds to a time class from T1 ( $t = 3.1$ ) at the top to T8 ( $t = 46.9$ ) at the bottom. Empirical data are shown in purple, the output of the gene circuit obtained using SA (RMS=11.03) is shown in orange, and the output of the gene circuit obtained using FIGR (RMS=13.29) is shown in green. The asterisk indicates the earlier retraction of the posterior border of the abdominal Gt domain in FIGR output as compared to data. Slightly shallow posterior border of the anterior Hb domain in FIGR output is indicated with  $\triangleleft$ . Slight ectopic bump in the anterior border of the posterior Hb domain in SA output is indicated with  $\triangleright$ .
