# Supplementary material
Source: publisher figshare collection journal article supplement (https://gsajournals.figshare.com/articles/dataset/_/9249245)
Supplement: Supplementary file 3 [file 1]

## S1 Alternative method for determining kinetic parameters

In the diffusion-less case, in addition to fitting the Glass equations to velocity data (Eq. 13), the kinetic parameters  $R$  and  $\lambda$  can also be determined by fitting Glass equation solutions (Eq. 5) to the concentration time series data. We identify time intervals during which all  $y$  are either positive or negative so that

$$x_m(t_k) = \begin{cases} x_m(t_0)e^{-\lambda\Delta t_k} + \frac{R}{\lambda}(1 - e^{-\lambda\Delta t_k}) & \text{if } y_m(t_k) = +1 \quad \forall k, \\ x_m(t_0)e^{-\lambda\Delta t_k} & \text{if } y_m(t_k) = -1 \quad \forall k, \end{cases} \quad (\text{S1})$$

where  $m$  and  $k$  index the time intervals and the time points lying inside a particular interval respectively. Within a particular interval,  $x_m(t_k)$  is the concentration at the  $k$ th time point,  $x_m(t_0)$  is the initial concentration, and  $\Delta t_k = t_k - t_0$  is the time elapsed from the start of the interval. Equations S1 are  $P \gg 2$  non-linear equations with two unknowns,  $R$  and  $\lambda$ , and can be fit relatively easily using off-the-shelf non-linear optimization methods. We used MATLAB's `lsqnonlin` function that implements a Trust-Region algorithm. This is implemented as the "conc" method of FIGR.
