# Supplementary material
Source: publisher figshare collection journal article supplement (https://gsajournals.figshare.com/articles/dataset/_/9249245)
Supplement: Supplementary file 4 [file 1]

| Description                                                                                                                            | Option/Parameter        | Acceptable Values | Values Utilized      |                    |
|----------------------------------------------------------------------------------------------------------------------------------------|-------------------------|-------------------|----------------------|--------------------|
|                                                                                                                                        |                         |                   | Synthetic Data Tests | Gap Gene Inference |
| Determining regulatory parameters                                                                                                      |                         |                   |                      |                    |
| Spline smoothing parameter for determining velocities                                                                                  | splinesmoothing         | [0, 1]            | 1                    | 0.01               |
| Velocity threshold for determining on/off state                                                                                        | slopethresh ( $v_g^c$ ) | $\geq 0$          | 0.01                 | 1                  |
| Expression threshold for determining on/off state                                                                                      | exprthresh ( $x_g^c$ )  | $> 0$             | 0.2                  | 100                |
| Determining kinetic parameters                                                                                                         |                         |                   |                      |                    |
| Method for determining the kinetic parameters                                                                                          | Rld_method              | 'slope'           | 'slope'              | 'kink'             |
|                                                                                                                                        |                         | 'kink'            |                      |                    |
|                                                                                                                                        |                         | 'conc'            |                      |                    |
| Determining kinetic parameters by “slope” method                                                                                       |                         |                   |                      |                    |
| Margin to exclude unreliable velocity estimates near maxima and minima of the time series                                              | Rld_tsafety             | $\geq 0$          | 3                    | NA                 |
| Determining kinetic parameters by “kink” method                                                                                        |                         |                   |                      |                    |
| Spline smoothing parameter for identifying spatial expression domains and border positions                                             | spatialsMOOTHING        | [0, 1]            | NA                   | 0.5                |
| Expression threshold above which points are included in fitting the kink equations, expressed as fraction of maximum domain expression | minborder_expr_ratio    | (0, 1)            | NA                   | 0.01               |

Table S1: User-defined options and parameters utilized in FIGR code. The spline smoothing parameter is passed to the spline-fitting `csaps` function of MATLAB. It takes values between 0 and 1, where 1 implies no smoothing while 0 results in a straight-line fit.
